# Supplementary material for: Augmented manipulation ability in humans with six-fingered hands
Source: PubMed Central journal article supplement (PMC6547737; doi:10.1038/s41467-019-10306-w), 2019-06-03
Supplement: 41467_2019_10306_MOESM11_ESM.pdf [file 41467_2019_10306_MOESM11_ESM.pdf]

## Reporting Summary

Nature Research wishes to improve the reproducibility of the work that we publish. This form provides structure for consistency and transparency in reporting. For further information on Nature Research policies, see [Authors & Referees](#) and the [Editorial Policy Checklist](#).

### Statistics

For all statistical analyses, confirm that the following items are present in the figure legend, table legend, main text, or Methods section.

n/a Confirmed

- |                                     |                                     |                                                                                                                                                                                                                                                            |
|-------------------------------------|-------------------------------------|------------------------------------------------------------------------------------------------------------------------------------------------------------------------------------------------------------------------------------------------------------|
| <input type="checkbox"/>            | <input checked="" type="checkbox"/> | The exact sample size ( $n$ ) for each experimental group/condition, given as a discrete number and unit of measurement                                                                                                                                    |
| <input checked="" type="checkbox"/> | <input type="checkbox"/>            | A statement on whether measurements were taken from distinct samples or whether the same sample was measured repeatedly                                                                                                                                    |
| <input type="checkbox"/>            | <input checked="" type="checkbox"/> | The statistical test(s) used AND whether they are one- or two-sided<br><i>Only common tests should be described solely by name; describe more complex techniques in the Methods section.</i>                                                               |
| <input type="checkbox"/>            | <input checked="" type="checkbox"/> | A description of all covariates tested                                                                                                                                                                                                                     |
| <input type="checkbox"/>            | <input checked="" type="checkbox"/> | A description of any assumptions or corrections, such as tests of normality and adjustment for multiple comparisons                                                                                                                                        |
| <input checked="" type="checkbox"/> | <input type="checkbox"/>            | A full description of the statistical parameters including central tendency (e.g. means) or other basic estimates (e.g. regression coefficient) AND variation (e.g. standard deviation) or associated estimates of uncertainty (e.g. confidence intervals) |
| <input type="checkbox"/>            | <input checked="" type="checkbox"/> | For null hypothesis testing, the test statistic (e.g. $F$ , $t$ , $r$ ) with confidence intervals, effect sizes, degrees of freedom and $P$ value noted<br><i>Give <math>P</math> values as exact values whenever suitable.</i>                            |
| <input checked="" type="checkbox"/> | <input type="checkbox"/>            | For Bayesian analysis, information on the choice of priors and Markov chain Monte Carlo settings                                                                                                                                                           |
| <input checked="" type="checkbox"/> | <input type="checkbox"/>            | For hierarchical and complex designs, identification of the appropriate level for tests and full reporting of outcomes                                                                                                                                     |
| <input checked="" type="checkbox"/> | <input type="checkbox"/>            | Estimates of effect sizes (e.g. Cohen's $d$ , Pearson's $r$ ), indicating how they were calculated                                                                                                                                                         |

*Our web collection on [statistics for biologists](#) contains articles on many of the points above.*

### Software and code

Policy information about [availability of computer code](#)

Data collection

Custom-made MATLAB scripts communicating with the API from the Polhemus liberty system. Psychophysics Toolbox Version 3 with custom-made MATLAB scripts. Custom program written in labview and experiment tasks written in Unity with a UDP protocol passing the data from labview. Custom-made python-based software for stimuli presentation inside the fMRI scanner.

Data analysis

Custom-made MATLAB scripts. SPM8 for fMRI data. OsiriX Dicom Viewer for the analysis of the anatomical MRI.

For manuscripts utilizing custom algorithms or software that are central to the research but not yet described in published literature, software must be made available to editors/reviewers. We strongly encourage code deposition in a community repository (e.g. GitHub). See the Nature Research [guidelines for submitting code & software](#) for further information.

### Data

Policy information about [availability of data](#)

All manuscripts must include a [data availability statement](#). This statement should provide the following information, where applicable:

- Accession codes, unique identifiers, or web links for publicly available datasets
- A list of figures that have associated raw data
- A description of any restrictions on data availability

The data are not available due to them containing information which could compromise research participant privacy and consent.

## Field-specific reporting

Please select the one below that is the best fit for your research. If you are not sure, read the appropriate sections before making your selection.

Life sciences       Behavioural & social sciences       Ecological, evolutionary & environmental sciences

For a reference copy of the document with all sections, see [nature.com/documents/nr-reporting-summary-flat.pdf](https://www.nature.com/documents/nr-reporting-summary-flat.pdf)

## Life sciences study design

All studies must disclose on these points even when the disclosure is negative.

|                 |                                                  |
|-----------------|--------------------------------------------------|
| Sample size     | <input type="text" value="see Methods section"/> |
| Data exclusions | <input type="text" value="see Methods section"/> |
| Replication     | <input type="text" value="N/A"/>                 |
| Randomization   | <input type="text" value="N/A"/>                 |
| Blinding        | <input type="text" value="N/A"/>                 |

## Reporting for specific materials, systems and methods

We require information from authors about some types of materials, experimental systems and methods used in many studies. Here, indicate whether each material, system or method listed is relevant to your study. If you are not sure if a list item applies to your research, read the appropriate section before selecting a response.

### Materials & experimental systems

|                                     |                                                                 |
|-------------------------------------|-----------------------------------------------------------------|
| n/a                                 | Involvement in the study                                        |
| <input checked="" type="checkbox"/> | <input type="checkbox"/> Antibodies                             |
| <input checked="" type="checkbox"/> | <input type="checkbox"/> Eukaryotic cell lines                  |
| <input checked="" type="checkbox"/> | <input type="checkbox"/> Palaeontology                          |
| <input checked="" type="checkbox"/> | <input type="checkbox"/> Animals and other organisms            |
| <input type="checkbox"/>            | <input checked="" type="checkbox"/> Human research participants |
| <input checked="" type="checkbox"/> | <input type="checkbox"/> Clinical data                          |

### Methods

|                                     |                                                            |
|-------------------------------------|------------------------------------------------------------|
| n/a                                 | Involvement in the study                                   |
| <input checked="" type="checkbox"/> | <input type="checkbox"/> ChIP-seq                          |
| <input checked="" type="checkbox"/> | <input type="checkbox"/> Flow cytometry                    |
| <input type="checkbox"/>            | <input checked="" type="checkbox"/> MRI-based neuroimaging |

## Human research participants

Policy information about [studies involving human research participants](#)

|                            |                                                                                                                                                                                                       |
|----------------------------|-------------------------------------------------------------------------------------------------------------------------------------------------------------------------------------------------------|
| Population characteristics | <input type="text" value="see Methods section"/>                                                                                                                                                      |
| Recruitment                | <input type="text" value="Polydactly subjects were identified on the internet and then recruited by contacting them directly. Five fingered subjects were recruited using flyers and lab websites."/> |
| Ethics oversight           | <input type="text" value="see Methods section"/>                                                                                                                                                      |

Note that full information on the approval of the study protocol must also be provided in the manuscript.

## Magnetic resonance imaging

### Experimental design

|                                 |                                                                                                                          |
|---------------------------------|--------------------------------------------------------------------------------------------------------------------------|
| Design type                     | <input type="text" value="task fMRI with block design"/>                                                                 |
| Design specifications           | <input type="text" value="24 blocks of 20 seconds of finger tapping and 10 seconds of rest (4 repetitions per finger)"/> |
| Behavioral performance measures | <input type="text" value="participants were trained on the finger tapping movements before entering the fMRI scanner"/>  |

## Acquisition

|                               |                                                                                                                                                                      |
|-------------------------------|----------------------------------------------------------------------------------------------------------------------------------------------------------------------|
| Imaging type(s)               | functional                                                                                                                                                           |
| Field strength                | 7T                                                                                                                                                                   |
| Sequence & imaging parameters | gradient echo EPI, resolution 1.3x1.3x1.3 mm <sup>3</sup> , slice thickness 1.3mm, no gap, matrix size 160x160, TR= 2s, FOV=210mm, TE=27ms, flip angle=75°, GRAPPA=2 |
| Area of acquisition           | Slices were manually placed over the central sulcus to cover the primary motor cortex                                                                                |
| Diffusion MRI                 | <input type="checkbox"/> Used <input checked="" type="checkbox"/> Not used                                                                                           |

## Preprocessing

|                            |                                                                                           |
|----------------------------|-------------------------------------------------------------------------------------------|
| Preprocessing software     | SPM8                                                                                      |
| Normalization              | analysis in native space                                                                  |
| Normalization template     | N/A                                                                                       |
| Noise and artifact removal | slice timing correction, spatial realignment, smoothing (FWHM=2mm) and temporal filtering |
| Volume censoring           | N/A                                                                                       |

## Statistical modeling & inference

|                                                                           |                                                                                                                  |
|---------------------------------------------------------------------------|------------------------------------------------------------------------------------------------------------------|
| Model type and settings                                                   | single subject RSA                                                                                               |
| Effect(s) tested                                                          | N/A                                                                                                              |
| Specify type of analysis:                                                 | <input type="checkbox"/> Whole brain <input checked="" type="checkbox"/> ROI-based <input type="checkbox"/> Both |
| Anatomical location(s)                                                    | primary motor cortex                                                                                             |
| Statistic type for inference<br>(See <a href="#">Eklund et al. 2016</a> ) | peak-level inference                                                                                             |
| Correction                                                                | FWE                                                                                                              |

## Models & analysis

|                                     |                                                                       |
|-------------------------------------|-----------------------------------------------------------------------|
| n/a                                 | Involved in the study                                                 |
| <input checked="" type="checkbox"/> | <input type="checkbox"/> Functional and/or effective connectivity     |
| <input checked="" type="checkbox"/> | <input type="checkbox"/> Graph analysis                               |
| <input checked="" type="checkbox"/> | <input type="checkbox"/> Multivariate modeling or predictive analysis |
